# Supplementary material
Source: Elsevier journal article supplement (http://library.osu.edu/projects/msa/suppmat/v262.i2.pp75-81/mmc1.pdf)
Supplement: mmc1 [file mmc1.pdf]

| Nr. | Symbol           | Fit / fix | Start value           | Fit 1                | Fit 1 $\delta$       |
|-----|------------------|-----------|-----------------------|----------------------|----------------------|
|     |                  |           |                       |                      | Save 1 in mol        |
| 1   | $G_{vz 0,0,0,0>$ | f         | 0.0                   | fixed                |                      |
| 2   | $G_{vz 2,0,0,0>$ | a         | 6483.281895           | 6483.28207           | 0.00006327152176     |
| 3   | $B_v 0,0,0,0>$   | a         | 1.439998947           | 1.439999232          | 0.0000014140322      |
| 4   | $B_v 2,0,0,0>$   | a         | 1.420452306           | 1.420452255          | 0.00000139322607     |
| 5   | $D_v 0,0,0,0>$   | a         | $2.77333 * 10^{-6}$   | $2.773523 * 10^{-6}$ | $0.000658 * 10^{-6}$ |
| 6   | $D_v 2,0,0,0>$   | a         | $2.72636 * 10^{-6}$   | $2.726391 * 10^{-6}$ | $0.000632 * 10^{-6}$ |
| 7   | $H_v 0,0,0,0>$   | a         | $4.700 * 10^{-12}$    | $4.7339 * 10^{-12}$  | $0.0920 * 10^{-12}$  |
| 8   | $H_v 2,0,0,0>$   | a         | $4.511 * 10^{-12}$    | $4.5234 * 10^{-12}$  | $0.0854 * 10^{-12}$  |
| 9   | $L_v 0,0,0,0>$   | f         | $-0.02462 * 10^{-14}$ | fixed                |                      |
| 10  | $L_v 2,0,0,0>$   | f         | $-0.01878 * 10^{-14}$ | fixed                |                      |

| Nr. | Symbol            | Fit / fix | Start value          | Fit 4                | Fit 4 $\delta$       |
|-----|-------------------|-----------|----------------------|----------------------|----------------------|
|     |                   |           |                      |                      | Save 4 in mol        |
| 1   | $G_{vz 0,1,1,0}$  | f         | 707.408891           | fixed                |                      |
| 2   | $G_{vz 2,1,1,0}$  | a         | 7153.082746          | 7153.082761          | 0.0001106807781      |
| 3   | $B_v 0,1,1,0$     | f         | 1.443157181          | fixed                |                      |
| 4   | $B_v 2,1,1,0$     | a         | 1.423987895          | 1.423987783          | 0.000000323881924    |
| 5   | $D_v 0,1,1,0$     | f         | $2.82774 * 10^{-6}$  | fixed                |                      |
| 6   | $D_v 2,1,1,0$     | a         | $2.789691 * 10^{-6}$ | $2.789574 * 10^{-6}$ | $0.000221 * 10^{-6}$ |
| 7   | $H_v 0,1,1,0$     | f         | $3.215 * 10^{-12}$   | fixed                |                      |
| 8   | $H_v 2,1,1,0$     | a         | $3.6552 * 10^{-12}$  | $3.6326 * 10^{-12}$  | $0.0406 * 10^{-12}$  |
| 9   | $Q_v 0,1,1,0$     | f         | $7.166195 * 10^{-3}$ | fixed                |                      |
| 10  | $Q_v 2,1,1,0$     | a         | $7.380181 * 10^{-3}$ | $7.380028 * 10^{-3}$ | $0.000403 * 10^{-3}$ |
| 11  | $Q_{vJ} 0,1,1,0$  | f         | $8.1073 * 10^{-8}$   | fixed                |                      |
| 12  | $Q_{vJ} 2,1,1,0$  | a         | $9.0921 * 10^{-8}$   | $9.0728 * 10^{-8}$   | $0.0340 * 10^{-8}$   |
| 13  | $Q_{vJJ} 0,1,1,0$ | f         | $1.135 * 10^{-12}$   | fixed                |                      |
| 14  | $Q_{vJJ} 2,1,1,0$ | a         | $1.5185 * 10^{-12}$  | $1.4797 * 10^{-12}$  | $0.0679 * 10^{-12}$  |

| Nr. | Symbol            | Fit / fix | Start value          | Fit 1                | Fit 1 $\delta$       |
|-----|-------------------|-----------|----------------------|----------------------|----------------------|
|     |                   |           |                      |                      | Save 1 in mol        |
| 1   | $Q_{1v 0,2,2,0}$  | f         | $0.0705 * 10^{-4}$   | fixed                |                      |
| 2   | $Q_{1v 2,2,2,0}$  | f         | $0.0705 * 10^{-4}$   | fixed                |                      |
| 3   | $G_{vz 0,2,0,0}$  | f         | 1399.760658          | fixed                |                      |
| 4   | $G_{vz 0,2,2,0}$  | f         | 1420.418451          | fixed                |                      |
| 5   | $G_{vz 2,2,0,0}$  | a         | 7807.96251           | 7807.962513          | 0.0002023839839      |
| 6   | $G_{vz 2,2,2,0}$  | a         | 7827.984987          | 7827.984985          | 0.0001428828726      |
| 7   | $B_v 0,2,0,0$     | f         | 1.446801862          | fixed                |                      |
| 8   | $B_v 0,2,2,0$     | f         | 1.445995548          | fixed                |                      |
| 9   | $B_v 2,2,0,0$     | a         | 1.428027143          | 1.428027106          | 0.0000009319778128   |
| 10  | $B_v 2,2,2,0$     | a         | 1.427209081          | 1.427209081          | 0.0000005622793527   |
| 11  | $D_v 0,2,0,0$     | f         | $2.88954 * 10^{-6}$  | fixed                |                      |
| 12  | $D_v 0,2,2,0$     | f         | $2.88341 * 10^{-6}$  | fixed                |                      |
| 13  | $D_v 2,2,0,0$     | a         | $2.864088 * 10^{-6}$ | $2.864051 * 10^{-6}$ | $0.000806 * 10^{-6}$ |
| 14  | $D_v 2,2,2,0$     | a         | $2.853750 * 10^{-6}$ | $2.853809 * 10^{-6}$ | $0.000456 * 10^{-6}$ |
| 15  | $H_v 0,2,0,0$     | f         | $4.344 * 10^{-12}$   | fixed                |                      |
| 16  | $H_v 0,2,2,0$     | f         | $3.336 * 10^{-12}$   | fixed                |                      |
| 17  | $H_v 2,2,0,0$     | a         | $5.156 * 10^{-12}$   | $5.149 * 10^{-12}$   | $0.180 * 10^{-12}$   |
| 18  | $H_v 2,2,2,0$     | a         | $4.2974 * 10^{-12}$  | $4.3161 * 10^{-12}$  | $0.0958 * 10^{-12}$  |
| 19  | $Q_v 0,2,2,0$     | f         | $7.26875 * 10^{-3}$  | fixed                |                      |
| 20  | $Q_v 2,2,2,0$     | a         | $7.500342 * 10^{-3}$ | $7.500324 * 10^{-3}$ | $0.000666 * 10^{-3}$ |
| 21  | $Q_{vJ} 0,2,2,0$  | f         | $8.4951 * 10^{-8}$   | fixed                |                      |
| 22  | $Q_{vJ} 2,2,2,0$  | a         | $9.5973 * 10^{-8}$   | $9.5966 * 10^{-8}$   | $0.0593 * 10^{-8}$   |
| 23  | $Q_{vJJ} 0,2,2,0$ | f         | $1.159 * 10^{-12}$   | fixed                |                      |
| 24  | $Q_{vJJ} 2,2,2,0$ | a         | $1.489 * 10^{-12}$   | $1.490 * 10^{-12}$   | $0.127 * 10^{-12}$   |
| 25  | $\rho_v 0,2,2,0$  | f         | $-1.714 * 10^{-8}$   | fixed                |                      |
| 26  | $\rho_v 2,2,2,0$  | f         | $-1.714 * 10^{-8}$   | fixed                |                      |

| Nr. | Symbol            | Fit / fix | Start value          | Fit 1                | Fit 1 $\delta$       |
|-----|-------------------|-----------|----------------------|----------------------|----------------------|
|     |                   |           |                      |                      | Save 1 in mol        |
| 1   | $Q_{1v 0,3,3,0}$  | f         | $0.0705 * 10^{-4}$   | fixed                |                      |
| 2   | $Q_{1v 2,3,3,0}$  | f         | $0.0705 * 10^{-4}$   | fixed                |                      |
| 3   | $G_{vz 0,3,1,0}$  | f         | 2097.719897          | fixed                |                      |
| 4   | $G_{vz 0,3,3,0}$  | f         | 2139.156364          | fixed                |                      |
| 5   | $G_{vz 2,3,1,0}$  | a         | 8467.981231          | 8467.981202          | 0.0001890741449      |
| 6   | $G_{vz 2,3,3,0}$  | a         | 8508.078564          | 8508.078565          | 0.0001746938084      |
| 7   | $B_v 0,3,1,0$     | f         | 1.450144159          | fixed                |                      |
| 8   | $B_v 0,3,3,0$     | f         | 1.448490235          | fixed                |                      |
| 9   | $B_v 2,3,1,0$     | a         | 1.431770084          | 1.431770234          | 0.000001242613699    |
| 10  | $B_v 2,3,3,0$     | a         | 1.430088906          | 1.430088876          | 0.000001219001148    |
| 11  | $D_v 0,3,1,0$     | f         | $2.94781 * 10^{-6}$  | fixed                |                      |
| 12  | $D_v 0,3,3,0$     | f         | $2.93419 * 10^{-6}$  | fixed                |                      |
| 13  | $D_v 2,3,1,0$     | a         | $2.93682 * 10^{-6}$  | $2.93702 * 10^{-6}$  | $0.00199 * 10^{-6}$  |
| 14  | $D_v 2,3,3,0$     | a         | $2.91128 * 10^{-6}$  | $2.91122 * 10^{-6}$  | $0.00205 * 10^{-6}$  |
| 15  | $H_v 0,3,1,0$     | f         | $4.62 * 10^{-12}$    | fixed                |                      |
| 16  | $H_v 0,3,3,0$     | f         | $3.14 * 10^{-12}$    | fixed                |                      |
| 17  | $H_v 2,3,1,0$     | a         | $9.570 * 10^{-12}$   | $9.644 * 10^{-12}$   | $0.858 * 10^{-12}$   |
| 18  | $H_v 2,3,3,0$     | a         | $3.242 * 10^{-12}$   | $3.216 * 10^{-12}$   | $0.921 * 10^{-12}$   |
| 19  | $Q_v 0,3,3,0$     | f         | $7.375054 * 10^{-3}$ | fixed                |                      |
| 20  | $Q_v 2,3,3,0$     | a         | $7.629462 * 10^{-3}$ | $7.629488 * 10^{-3}$ | $0.000674 * 10^{-3}$ |
| 21  | $Q_{vJ} 0,3,3,0$  | f         | $8.9691 * 10^{-8}$   | fixed                |                      |
| 22  | $Q_{vJ} 2,3,3,0$  | a         | $10.416 * 10^{-8}$   | $10.422 * 10^{-8}$   | $0.135 * 10^{-8}$    |
| 23  | $Q_{vJJ} 0,3,3,0$ | f         | $1.099 * 10^{-12}$   | fixed                |                      |
| 24  | $Q_{vJJ} 2,3,3,0$ | a         | $2.560 * 10^{-12}$   | $2.583 * 10^{-12}$   | $0.628 * 10^{-12}$   |
| 25  | $\rho_v 0,3,3,0$  | f         | $-1.752 * 10^{-8}$   | fixed                |                      |
| 26  | $\rho_v 2,3,3,0$  | a         | $-1.94639 * 10^{-8}$ | $-1.94636 * 10^{-8}$ | $0.00986 * 10^{-8}$  |

| Nr. | Symbol            | Fit / fix | Start value          | Fit 1               | Fit 1 $\delta$      |
|-----|-------------------|-----------|----------------------|---------------------|---------------------|
|     |                   |           |                      |                     | Save 1 in mol       |
| 1   | $Q_{1v 0,4,4,0}$  | f         | $0.0705 * 10^{-4}$   | fixed               |                     |
| 2   | $Q_{1v 2,4,4,0}$  | f         | $0.0705 * 10^{-4}$   | fixed               |                     |
| 3   | $G_{vz 0,4,0,0}$  | f         | 2780.58537           | fixed               |                     |
| 4   | $G_{vz 0,4,2,0}$  | f         | 2801.396409          | fixed               |                     |
| 5   | $G_{vz 0,4,4,0}$  | f         | 2863.745264          | fixed               |                     |
| 6   | $G_{vz 2,4,0,0}$  | a         | 9113.095423          | 9113.095423         | 0.0007313972486     |
| 7   | $G_{vz 2,4,2,0}$  | a         | 9133.208601          | 9133.208601         | 0.0004906243453     |
| 8   | $G_{vz 2,4,4,0}$  | a         | 9193.446759          | 9193.446759         | 0.000537823642      |
| 9   | $B_v 0,4,0,0$     | f         | 1.454009157          | fixed               |                     |
| 10  | $B_v 0,4,2,0$     | f         | 1.45315884           | fixed               |                     |
| 11  | $B_v 0,4,4,0$     | f         | 1.45061579           | fixed               |                     |
| 12  | $B_v 2,4,0,0$     | a         | 1.436045387          | 1.436045387         | 0.00000485188277    |
| 13  | $B_v 2,4,2,0$     | a         | 1.435181124          | 1.435181124         | 0.000003274543628   |
| 14  | $B_v 2,4,4,0$     | a         | 1.432612426          | 1.432612426         | 0.000003122481543   |
| 15  | $D_v 0,4,0,0$     | f         | $3.00968 * 10^{-6}$  | fixed               |                     |
| 16  | $D_v 0,4,2,0$     | f         | $3.00223 * 10^{-6}$  | fixed               |                     |
| 17  | $D_v 0,4,4,0$     | f         | $2.97935 * 10^{-6}$  | fixed               |                     |
| 18  | $D_v 2,4,0,0$     | a         | $2.99359 * 10^{-6}$  | $2.99359 * 10^{-6}$ | $0.00692 * 10^{-6}$ |
| 19  | $D_v 2,4,2,0$     | a         | $2.99950 * 10^{-6}$  | $2.99950 * 10^{-6}$ | $0.00464 * 10^{-6}$ |
| 20  | $D_v 2,4,4,0$     | a         | $2.97108 * 10^{-6}$  | $2.97108 * 10^{-6}$ | $0.00427 * 10^{-6}$ |
| 21  | $H_v 0,4,0,0$     | f         | $5.73 * 10^{-12}$    | fixed               |                     |
| 22  | $H_v 0,4,2,0$     | f         | $4.94 * 10^{-12}$    | fixed               |                     |
| 23  | $H_v 0,4,4,0$     | f         | $2.47 * 10^{-12}$    | fixed               |                     |
| 24  | $H_v 2,4,0,0$     | a         | $11.28 * 10^{-12}$   | $11.28 * 10^{-12}$  | $2.56 * 10^{-12}$   |
| 25  | $H_v 2,4,2,0$     | a         | $3.31 * 10^{-12}$    | $3.31 * 10^{-12}$   | $1.75 * 10^{-12}$   |
| 26  | $H_v 2,4,4,0$     | a         | $5.09 * 10^{-12}$    | $5.09 * 10^{-12}$   | $1.59 * 10^{-12}$   |
| 27  | $Q_v 0,4,4,0$     | f         | $7.483926 * 10^{-3}$ | fixed               |                     |
| 28  | $Q_v 2,4,4,0$     | a         | $7.76275 * 10^{-3}$  | $7.76275 * 10^{-3}$ | $0.00114 * 10^{-3}$ |
| 29  | $Q_{vJ} 0,4,4,0$  | f         | $9.4307 * 10^{-8}$   | fixed               |                     |
| 30  | $Q_{vJ} 2,4,4,0$  | a         | $11.1068 * 10^{-8}$  | $11.1068 * 10^{-8}$ | $0.0736 * 10^{-8}$  |
| 31  | $Q_{vJJ} 0,4,4,0$ | f         | $1.136 * 10^{-12}$   | fixed               |                     |
| 32  | $Q_{vJJ} 2,4,4,0$ | f         | $1.136 * 10^{-12}$   | fixed               |                     |
| 33  | $\rho_v 0,4,4,0$  | f         | $-1.805 * 10^{-8}$   | fixed               |                     |
| 34  | $\rho_v 2,4,4,0$  | a         | $-2.6991 * 10^{-8}$  | $-2.6991 * 10^{-8}$ | $0.0482 * 10^{-8}$  |

| Nr. | Symbol            | Fit / fix | Start value          | Fit 1               | Fit 1 $\delta$      |
|-----|-------------------|-----------|----------------------|---------------------|---------------------|
|     |                   |           |                      |                     | Save 1 in mol       |
| 1   | $Q_{1v 0,5,5,0}$  | f         | $0.0705 * 10^{-4}$   | fixed               |                     |
| 2   | $Q_{1v 2,5,5,0}$  | a         | $0.4107 * 10^{-4}$   | $0.4113 * 10^{-4}$  | $0.0826 * 10^{-4}$  |
| 3   | $G_{vz 0,5,1,0}$  | f         | 3469.106005          | fixed               |                     |
| 4   | $G_{vz 0,5,3,0}$  | f         | 3510.89519           | fixed               |                     |
| 5   | $G_{vz 0,5,5,0}$  | f         | 3594.301517          | fixed               |                     |
| 6   | $G_{vz 2,5,1,0}$  | a         | 9763.372758          | 9763.372765         | 0.0007163864016     |
| 7   | $G_{vz 2,5,3,0}$  | a         | 9803.701377          | 9803.701267         | 0.0006484847589     |
| 8   | $G_{vz 2,5,5,0}$  | a         | 9884.17              | 9884.169999         | 0.0006962615076     |
| 9   | $B_v 0,5,1,0$     | f         | 1.45756602           | fixed               |                     |
| 10  | $B_v 0,5,3,0$     | f         | 1.45581826           | fixed               |                     |
| 11  | $B_v 0,5,5,0$     | f         | 1.45234423           | fixed               |                     |
| 12  | $B_v 2,5,1,0$     | a         | 1.440004257          | 1.440004188         | 0.000004206415904   |
| 13  | $B_v 2,5,3,0$     | a         | 1.438246339          | 1.438246678         | 0.000003516755275   |
| 14  | $B_v 2,5,5,0$     | a         | 1.434742161          | 1.434742172         | 0.000003263484202   |
| 15  | $D_v 0,5,1,0$     | f         | $3.06637 * 10^{-6}$  | fixed               |                     |
| 16  | $D_v 0,5,3,0$     | f         | $3.05137 * 10^{-6}$  | fixed               |                     |
| 17  | $D_v 0,5,5,0$     | f         | $3.01748 * 10^{-6}$  | fixed               |                     |
| 18  | $D_v 2,5,1,0$     | a         | $2.9029 * 10^{-6}$   | $2.9026 * 10^{-6}$  | $0.0415 * 10^{-6}$  |
| 19  | $D_v 2,5,3,0$     | a         | $3.0032 * 10^{-6}$   | $3.0033 * 10^{-6}$  | $0.0129 * 10^{-6}$  |
| 20  | $D_v 2,5,5,0$     | a         | $3.2298 * 10^{-6}$   | $3.2301 * 10^{-6}$  | $0.0541 * 10^{-6}$  |
| 21  | $H_v 0,5,1,0$     | f         | $6.28 * 10^{-12}$    | fixed               |                     |
| 22  | $H_v 0,5,3,0$     | f         | $4.65 * 10^{-12}$    | fixed               |                     |
| 23  | $H_v 0,5,5,0$     | f         | $1.39 * 10^{-12}$    | fixed               |                     |
| 24  | $H_v 2,5,1,0$     | f         | $6.93 * 10^{-12}$    | fixed               |                     |
| 25  | $H_v 2,5,3,0$     | f         | $5.242 * 10^{-12}$   | fixed               |                     |
| 26  | $H_v 2,5,5,0$     | f         | $4. * 10^{-12}$      | fixed               |                     |
| 27  | $Q_{v 0,5,5,0}$   | f         | $7.598273 * 10^{-3}$ | fixed               |                     |
| 28  | $Q_{v 2,5,5,0}$   | a         | $7.89258 * 10^{-3}$  | $7.89256 * 10^{-3}$ | $0.00124 * 10^{-3}$ |
| 29  | $Q_{vJ 0,5,5,0}$  | f         | $9.991 * 10^{-8}$    | fixed               |                     |
| 30  | $Q_{vJ 2,5,5,0}$  | a         | $11.925 * 10^{-8}$   | $11.923 * 10^{-8}$  | $0.129 * 10^{-8}$   |
| 31  | $Q_{vJJ 0,5,5,0}$ | f         | $1.2 * 10^{-12}$     | fixed               |                     |
| 32  | $Q_{vJJ 2,5,5,0}$ | f         | $1.2 * 10^{-12}$     | fixed               |                     |
| 33  | $\rho_v 0,5,5,0$  | f         | $-1.885 * 10^{-8}$   | fixed               |                     |
| 34  | $\rho_v 2,5,5,0$  | a         | $-6.081 * 10^{-8}$   | $-6.088 * 10^{-8}$  | $0.956 * 10^{-8}$   |

| Nr. | Symbol            | Fit / fix | Start value         | Fit 1               | Fit 1 $\delta$      |
|-----|-------------------|-----------|---------------------|---------------------|---------------------|
|     |                   |           |                     |                     | Save 1 in mol       |
| 1   | $Q_{1v 0,6,6,0}$  | f         | $0.0705 * 10^{-4}$  | fixed               |                     |
| 2   | $Q_{1v 2,6,6,0}$  | f         | $0.0705 * 10^{-4}$  | fixed               |                     |
| 3   | $G_{vz 0,6,0,0}$  | f         | 4142.356311         | fixed               |                     |
| 4   | $G_{vz 0,6,2,0}$  | f         | 4163.368023         | fixed               |                     |
| 5   | $G_{vz 0,6,4,0}$  | f         | 4226.315447         | fixed               |                     |
| 6   | $G_{vz 0,6,6,0}$  | f         | 4330.934569         | fixed               |                     |
| 7   | $G_{vz 2,6,0,0}$  | a         | 10398.58446         | 10398.5846          | 0.001938150971      |
| 8   | $G_{vz 2,6,2,0}$  | a         | 10418.85151         | 10418.85185         | 0.001410694735      |
| 9   | $G_{vz 2,6,4,0}$  | a         | 10479.52778         | 10479.52806         | 0.0009310533888     |
| 10  | $G_{vz 2,6,6,0}$  | a         | 10580.31761         | 10580.31751         | 0.001260490595      |
| 11  | $B_v 0,6,0,0$     | f         | 1.46168866          | fixed               |                     |
| 12  | $B_v 0,6,2,0$     | f         | 1.46078915          | fixed               |                     |
| 13  | $B_v 0,6,4,0$     | f         | 1.4580952           | fixed               |                     |
| 14  | $B_v 0,6,6,0$     | f         | 1.45364858          | fixed               |                     |
| 15  | $B_v 2,6,0,0$     | a         | 1.444618469         | 1.444621243         | 0.00001712841131    |
| 16  | $B_v 2,6,2,0$     | a         | 1.443643265         | 1.443640747         | 0.00001033540194    |
| 17  | $B_v 2,6,4,0$     | a         | 1.440931269         | 1.440929946         | 0.000006232915188   |
| 18  | $B_v 2,6,6,0$     | a         | 1.436463883         | 1.436464463         | 0.000007578716881   |
| 19  | $D_v 0,6,0,0$     | f         | $3.1294 * 10^{-6}$  | fixed               |                     |
| 20  | $D_v 0,6,2,0$     | f         | $3.1193 * 10^{-6}$  | fixed               |                     |
| 21  | $D_v 0,6,4,0$     | f         | $3.09318 * 10^{-6}$ | fixed               |                     |
| 22  | $D_v 0,6,6,0$     | f         | $3.04816 * 10^{-6}$ | fixed               |                     |
| 23  | $D_v 2,6,0,0$     | a         | $3.2314 * 10^{-6}$  | $3.2364 * 10^{-6}$  | $0.0324 * 10^{-6}$  |
| 24  | $D_v 2,6,2,0$     | a         | $3.0792 * 10^{-6}$  | $3.0758 * 10^{-6}$  | $0.0174 * 10^{-6}$  |
| 25  | $D_v 2,6,4,0$     | a         | $3.09372 * 10^{-6}$ | $3.09238 * 10^{-6}$ | $0.00763 * 10^{-6}$ |
| 26  | $D_v 2,6,6,0$     | a         | $3.06698 * 10^{-6}$ | $3.06752 * 10^{-6}$ | $0.00917 * 10^{-6}$ |
| 27  | $H_v 0,6,0,0$     | f         | $7.24 * 10^{-12}$   | fixed               |                     |
| 28  | $H_v 0,6,2,0$     | f         | $6.43 * 10^{-12}$   | fixed               |                     |
| 29  | $H_v 0,6,4,0$     | f         | $3.98 * 10^{-12}$   | fixed               |                     |
| 30  | $H_v 0,6,6,0$     | f         | $-0.1 * 10^{-12}$   | fixed               |                     |
| 31  | $H_v 2,6,0,0$     | f         | $7.907 * 10^{-12}$  | fixed               |                     |
| 32  | $H_v 2,6,2,0$     | f         | $7.063 * 10^{-12}$  | fixed               |                     |
| 33  | $H_v 2,6,4,0$     | f         | $4.531 * 10^{-12}$  | fixed               |                     |
| 34  | $H_v 2,6,6,0$     | f         | $0.311 * 10^{-12}$  | fixed               |                     |
| 35  | $Q_v 0,6,6,0$     | f         | $7.71428 * 10^{-3}$ | fixed               |                     |
| 36  | $Q_v 2,6,6,0$     | a         | $8.02286 * 10^{-3}$ | $8.02377 * 10^{-3}$ | $0.00500 * 10^{-3}$ |
| 37  | $Q_{vJ} 0,6,6,0$  | f         | $10.357 * 10^{-8}$  | fixed               |                     |
| 38  | $Q_{vJ} 2,6,6,0$  | a         | $12.489 * 10^{-8}$  | $12.718 * 10^{-8}$  | $0.619 * 10^{-8}$   |
| 39  | $Q_{vJJ} 0,6,6,0$ | f         | $0.45 * 10^{-12}$   | fixed               |                     |
| 40  | $Q_{vJJ} 2,6,6,0$ | f         | $1.1 * 10^{-12}$    | fixed               |                     |
| 41  | $\rho_v 0,6,6,0$  | f         | $-1.926 * 10^{-8}$  | fixed               |                     |

|    |                      |          |                    |                    |                   |
|----|----------------------|----------|--------------------|--------------------|-------------------|
| 42 | $\rho_{\nu 2,6,6,0}$ | <b>a</b> | $-1.751 * 10^{-8}$ | $-1.752 * 10^{-8}$ | $0.346 * 10^{-8}$ |
|----|----------------------|----------|--------------------|--------------------|-------------------|

| Nr. | Symbol           | Fit / fix | Start value         | Fit 1               | Fit 1 $\delta$      |
|-----|------------------|-----------|---------------------|---------------------|---------------------|
|     |                  |           |                     |                     | Save 1 in mol       |
| 1   | $G_{vz 1,0,0,0>$ | f         | 3293.513232         | fixed               |                     |
| 2   | $G_{vz 3,0,0,0>$ | a         | 9571.696905         | 9571.696846         | 0.0004279617899     |
| 3   | $B_v 1,0,0,0>$   | f         | 1.43037261          | fixed               |                     |
| 4   | $B_v 3,0,0,0>$   | a         | 1.410235098         | 1.410235658         | 0.000002249090592   |
| 5   | $D_v 1,0,0,0>$   | f         | $2.7468 * 10^{-6}$  | fixed               |                     |
| 6   | $D_v 3,0,0,0>$   | a         | $2.70253 * 10^{-6}$ | $2.70321 * 10^{-6}$ | $0.00271 * 10^{-6}$ |
| 7   | $H_v 1,0,0,0>$   | f         | $3.38 * 10^{-12}$   | fixed               |                     |
| 8   | $H_v 3,0,0,0>$   | a         | $3.652 * 10^{-12}$  | $3.797 * 10^{-12}$  | $0.869 * 10^{-12}$  |

| Nr. | Symbol             | Fit / fix | Start value         | Fit 1               | Fit 1 $\delta$      |
|-----|--------------------|-----------|---------------------|---------------------|---------------------|
|     |                    |           |                     |                     | Save 1 in mol       |
| 1   | $G_{vz 1,1,1,0>$   | f         | 3982.205909         | fixed               |                     |
| 2   | $G_{vz 3,1,1,0>$   | a         | 10222.28749         | 10222.28747         | 0.0003277527161     |
| 3   | $B_v 1,1,1,0>$     | f         | 1.43371862          | fixed               |                     |
| 4   | $B_v 3,1,1,0>$     | a         | 1.413967143         | 1.413967496         | 0.000002703402265   |
| 5   | $D_v 1,1,1,0>$     | f         | $2.80927 * 10^{-6}$ | fixed               |                     |
| 6   | $D_v 3,1,1,0>$     | a         | $2.77867 * 10^{-6}$ | $2.77958 * 10^{-6}$ | $0.00520 * 10^{-6}$ |
| 7   | $H_v 1,1,1,0>$     | f         | $3.56 * 10^{-12}$   | fixed               |                     |
| 8   | $H_v 3,1,1,0>$     | a         | $8.91 * 10^{-12}$   | $9.46 * 10^{-12}$   | $2.69 * 10^{-12}$   |
| 9   | $Q_v 1,1,1,0>$     | f         | $7.29154 * 10^{-3}$ | fixed               |                     |
| 10  | $Q_v 3,1,1,0>$     | a         | $7.44989 * 10^{-3}$ | $7.45216 * 10^{-3}$ | $0.00162 * 10^{-3}$ |
| 11  | $Q_{vJ} 1,1,1,0>$  | f         | $8.723 * 10^{-8}$   | fixed               |                     |
| 12  | $Q_{vJ} 3,1,1,0>$  | a         | $8.854 * 10^{-8}$   | $9.457 * 10^{-8}$   | $0.164 * 10^{-8}$   |
| 13  | $Q_{vJJ} 1,1,1,0>$ | f         | $1.1 * 10^{-12}$    | fixed               |                     |
| 14  | $Q_{vJJ} 3,1,1,0>$ | f         | $1.1 * 10^{-12}$    | fixed               |                     |

| Nr. | Symbol            | Fit / fix | Start value         | Fit 1               | Fit 1 $\delta$      |
|-----|-------------------|-----------|---------------------|---------------------|---------------------|
|     |                   |           |                     |                     | Save 1 in mol       |
| 1   | $Q_{1v 1,2,2,0}$  | f         | $0.0705 * 10^{-4}$  | fixed               |                     |
| 2   | $Q_{1v 3,2,2,0}$  | f         | $0.0705 * 10^{-4}$  | fixed               |                     |
| 3   | $G_{vz 1,2,0,0}$  | f         | 4655.840604         | fixed               |                     |
| 4   | $G_{vz 1,2,2,0}$  | f         | 4676.255877         | fixed               |                     |
| 5   | $G_{vz 3,2,0,0}$  | a         | 10858.19254         | 10858.19254         | 0.0006564790954     |
| 6   | $G_{vz 3,2,2,0}$  | a         | 10877.75125         | 10877.75125         | 0.0004445934344     |
| 7   | $B_v 1,2,0,0$     | f         | 1.43756761          | fixed               |                     |
| 8   | $B_v 1,2,2,0$     | f         | 1.43674813          | fixed               |                     |
| 9   | $B_v 3,2,0,0$     | a         | 1.418164711         | 1.418164711         | 0.000005224720167   |
| 10  | $B_v 3,2,2,0$     | a         | 1.417375362         | 1.417375362         | 0.000003103053772   |
| 11  | $D_v 1,2,0,0$     | f         | $2.87877 * 10^{-6}$ | fixed               |                     |
| 12  | $D_v 1,2,2,0$     | f         | $2.87058 * 10^{-6}$ | fixed               |                     |
| 13  | $D_v 3,2,0,0$     | a         | $2.83323 * 10^{-6}$ | $2.83323 * 10^{-6}$ | $0.00580 * 10^{-6}$ |
| 14  | $D_v 3,2,2,0$     | a         | $2.84025 * 10^{-6}$ | $2.84025 * 10^{-6}$ | $0.00326 * 10^{-6}$ |
| 15  | $H_v 1,2,0,0$     | f         | $4.69 * 10^{-12}$   | fixed               |                     |
| 16  | $H_v 1,2,2,0$     | f         | $4.09 * 10^{-12}$   | fixed               |                     |
| 17  | $H_v 3,2,0,0$     | f         | $5.143 * 10^{-12}$  | fixed               |                     |
| 18  | $H_v 3,2,2,0$     | f         | $4.299 * 10^{-12}$  | fixed               |                     |
| 19  | $Q_{v 1,2,2,0}$   | f         | $7.40491 * 10^{-3}$ | fixed               |                     |
| 20  | $Q_{v 3,2,2,0}$   | a         | $7.59592 * 10^{-3}$ | $7.59592 * 10^{-3}$ | $0.00644 * 10^{-3}$ |
| 21  | $Q_{vJ 1,2,2,0}$  | f         | $9.252 * 10^{-8}$   | fixed               |                     |
| 22  | $Q_{vJ 3,2,2,0}$  | a         | $11.550 * 10^{-8}$  | $11.550 * 10^{-8}$  | $0.709 * 10^{-8}$   |
| 23  | $Q_{vJJ 1,2,2,0}$ | f         | $1.1 * 10^{-12}$    | fixed               |                     |
| 24  | $Q_{vJJ 3,2,2,0}$ | f         | $1.1 * 10^{-12}$    | fixed               |                     |
| 25  | $\rho_v 1,2,2,0$  | f         | $-1.714 * 10^{-8}$  | fixed               |                     |
| 26  | $\rho_v 3,2,2,0$  | f         | $-1.714 * 10^{-8}$  | fixed               |                     |

| Nr. | Symbol           | Fit / fix | Start value         | Fit 1               | Fit 1 $\delta$      |
|-----|------------------|-----------|---------------------|---------------------|---------------------|
|     |                  |           |                     |                     | Save 1 in mol       |
| 1   | $G_{vz 0,0,0,1}$ | f         | 2063.047099         | fixed               |                     |
| 2   | $G_{vz 2,0,0,1}$ | a         | 8519.243778         | 8519.243778         | 0.0002931910586     |
| 3   | $B_v 0,0,0,1$    | f         | 1.430246801         | fixed               |                     |
| 4   | $B_v 2,0,0,1$    | a         | 1.411083883         | 1.411083883         | 0.000001443596331   |
| 5   | $D_v 0,0,0,1$    | f         | $2.77499 * 10^{-6}$ | fixed               |                     |
| 6   | $D_v 2,0,0,1$    | a         | $2.73227 * 10^{-6}$ | $2.73227 * 10^{-6}$ | $0.00166 * 10^{-6}$ |
| 7   | $H_v 0,0,0,1$    | f         | $3.03 * 10^{-12}$   | fixed               |                     |
| 8   | $H_v 2,0,0,1$    | a         | $3.301 * 10^{-12}$  | $3.301 * 10^{-12}$  | $0.505 * 10^{-12}$  |

| Nr. | Symbol            | Fit / fix | Start value         | Fit 1               | Fit 1 $\delta$      |
|-----|-------------------|-----------|---------------------|---------------------|---------------------|
|     |                   |           |                     |                     | Save 1 in mol       |
| 1   | $G_{vz 0,1,1,1}$  | f         | 2766.73776          | fixed               |                     |
| 2   | $G_{vz 2,1,1,1}$  | a         | 9185.820009         | 9185.820009         | 0.0003654884919     |
| 3   | $B_v 0,1,1,1$     | f         | 1.43329914          | fixed               |                     |
| 4   | $B_v 2,1,1,1$     | a         | 1.414522941         | 1.414522941         | 0.000002353339668   |
| 5   | $D_v 0,1,1,1$     | f         | $2.83315 * 10^{-6}$ | fixed               |                     |
| 6   | $D_v 2,1,1,1$     | a         | $2.80061 * 10^{-6}$ | $2.80061 * 10^{-6}$ | $0.00364 * 10^{-6}$ |
| 7   | $H_v 0,1,1,1$     | f         | $3.52 * 10^{-12}$   | fixed               |                     |
| 8   | $H_v 2,1,1,1$     | a         | $3.82 * 10^{-12}$   | $3.82 * 10^{-12}$   | $1.50 * 10^{-12}$   |
| 9   | $Q_v 0,1,1,1$     | f         | $7.15128 * 10^{-3}$ | fixed               |                     |
| 10  | $Q_v 2,1,1,1$     | a         | $7.47974 * 10^{-3}$ | $7.47974 * 10^{-3}$ | $0.00273 * 10^{-3}$ |
| 11  | $Q_{vJ} 0,1,1,1$  | f         | $8.0507 * 10^{-8}$  | fixed               |                     |
| 12  | $Q_{vJ} 2,1,1,1$  | a         | $10.043 * 10^{-8}$  | $10.043 * 10^{-8}$  | $0.532 * 10^{-8}$   |
| 13  | $Q_{vJJ} 0,1,1,1$ | f         | $1.07 * 10^{-12}$   | fixed               |                     |
| 14  | $Q_{vJJ} 2,1,1,1$ | a         | $4.18 * 10^{-12}$   | $4.18 * 10^{-12}$   | $2.39 * 10^{-12}$   |

| Nr. | Symbol            | Fit / fix | Start value         | Fit 1               | Fit 1 $\delta$      |
|-----|-------------------|-----------|---------------------|---------------------|---------------------|
|     |                   |           |                     |                     | Save 1 in mol       |
| 1   | $Q_{1v 0,2,2,1}$  | f         | $0.0705 * 10^{-4}$  | fixed               |                     |
| 2   | $Q_{1v 2,2,2,1}$  | f         | $0.0705 * 10^{-4}$  | fixed               |                     |
| 3   | $G_{vz 0,2,0,1}$  | f         | 3455.790658         | fixed               |                     |
| 4   | $G_{vz 0,2,2,1}$  | f         | 3476.021425         | fixed               |                     |
| 5   | $G_{vz 2,2,0,1}$  | a         | 9837.711465         | 9837.71148          | 0.001163930532      |
| 6   | $G_{vz 2,2,2,1}$  | a         | 9857.539731         | 9857.539723         | 0.0007100093111     |
| 7   | $B_v 0,2,0,1$     | f         | 1.43682343          | fixed               |                     |
| 8   | $B_v 0,2,2,1$     | f         | 1.43603278          | fixed               |                     |
| 9   | $B_v 2,2,0,1$     | a         | 1.418474859         | 1.418474976         | 0.000005290165709   |
| 10  | $B_v 2,2,2,1$     | a         | 1.417644082         | 1.417644043         | 0.00000315250712    |
| 11  | $D_v 0,2,0,1$     | f         | $2.89374 * 10^{-6}$ | fixed               |                     |
| 12  | $D_v 0,2,2,1$     | f         | $2.88695 * 10^{-6}$ | fixed               |                     |
| 13  | $D_v 2,2,0,1$     | a         | $2.88538 * 10^{-6}$ | $2.88553 * 10^{-6}$ | $0.00424 * 10^{-6}$ |
| 14  | $D_v 2,2,2,1$     | a         | $2.86582 * 10^{-6}$ | $2.86577 * 10^{-6}$ | $0.00257 * 10^{-6}$ |
| 15  | $H_v 0,2,0,1$     | f         | $4.22 * 10^{-12}$   | fixed               |                     |
| 16  | $H_v 0,2,2,1$     | f         | $3.41 * 10^{-12}$   | fixed               |                     |
| 17  | $H_v 2,2,0,1$     | f         | $4.843 * 10^{-12}$  | fixed               |                     |
| 18  | $H_v 2,2,2,1$     | f         | $3.999 * 10^{-12}$  | fixed               |                     |
| 19  | $Q_v 0,2,2,1$     | f         | $7.23863 * 10^{-3}$ | fixed               |                     |
| 20  | $Q_v 2,2,2,1$     | a         | $7.60635 * 10^{-3}$ | $7.60741 * 10^{-3}$ | $0.00387 * 10^{-3}$ |
| 21  | $Q_{vJ} 0,2,2,1$  | f         | $8.453 * 10^{-8}$   | fixed               |                     |
| 22  | $Q_{vJ} 2,2,2,1$  | a         | $11.763 * 10^{-8}$  | $11.986 * 10^{-8}$  | $0.347 * 10^{-8}$   |
| 23  | $Q_{vJJ} 0,2,2,1$ | f         | $1.1 * 10^{-12}$    | fixed               |                     |
| 24  | $Q_{vJJ} 2,2,2,1$ | f         | $1.1 * 10^{-12}$    | fixed               |                     |
| 25  | $\rho_v 0,2,2,1$  | f         | $-1.579 * 10^{-8}$  | fixed               |                     |
| 26  | $\rho_v 2,2,2,1$  | f         | $-1.58 * 10^{-8}$   | fixed               |                     |

| Nr. | Symbol            | Fit / fix | Start value         | Fit 1              | Fit 1 $\delta$     |
|-----|-------------------|-----------|---------------------|--------------------|--------------------|
|     |                   |           |                     |                    | Save 1 in mol      |
| 1   | $G_{vz 0,0,0,0}$  | f         | 0.0                 | fixed              |                    |
| 2   | $G_{vz 1,2,0,1}$  | a         | 6699.102016         | 6699.102016        | 0.000942534489     |
| 3   | $G_{vz 1,2,2,1}$  | f         | 6719.31818          | fixed              |                    |
| 4   | $B_v 0,0,0,0$     | f         | 1.440000472         | fixed              |                    |
| 5   | $B_v 1,2,0,1$     | a         | 1.427818941         | 1.427818939        | 0.000006860791079  |
| 6   | $B_v 1,2,2,1$     | f         | 1.4270048           | fixed              |                    |
| 7   | $D_v 0,0,0,0$     | f         | $2.76854 * 10^{-6}$ | fixed              |                    |
| 8   | $D_v 1,2,0,1$     | a         | $2.9026 * 10^{-6}$  | $2.9026 * 10^{-6}$ | $0.0171 * 10^{-6}$ |
| 9   | $D_v 1,2,2,1$     | f         | $2.875 * 10^{-6}$   | fixed              |                    |
| 10  | $H_v 0,0,0,0$     | f         | $2.701 * 10^{-12}$  | fixed              |                    |
| 11  | $H_v 1,2,0,1$     | f         | $4.92 * 10^{-12}$   | fixed              |                    |
| 12  | $H_v 1,2,2,1$     | f         | $4.32 * 10^{-12}$   | fixed              |                    |
| 13  | $Q_v 1,2,2,1$     | a         | $7.4600 * 10^{-3}$  | $7.4600 * 10^{-3}$ | $0.0264 * 10^{-3}$ |
| 14  | $Q_{vJ} 1,2,2,1$  | f         | $9.55 * 10^{-8}$    | fixed              |                    |
| 15  | $Q_{vJJ} 1,2,2,1$ | f         | $1.1 * 10^{-12}$    | fixed              |                    |
| 16  | $\rho_v 1,2,2,1$  | f         | $-1.714 * 10^{-8}$  | fixed              |                    |

| Nr. | Symbol            | Fit / fix | Start value          | Fit 1                | Fit 1 $\delta$       |
|-----|-------------------|-----------|----------------------|----------------------|----------------------|
|     |                   |           |                      |                      | Save 1 in mol        |
| 1   | $Q_{1v 1,3,3,1}$  | f         | $0.0828 * 10^{-4}$   | fixed                |                      |
| 2   | $G_{vz 0,1,1,0}$  | f         | 707.408891           | fixed                |                      |
| 3   | $G_{vz 1,3,1,1}$  | a         | 7374.845596          | 7374.845596          | 0.0004704974009      |
| 4   | $G_{vz 1,3,3,1}$  | f         | 7415.389112          | fixed                |                      |
| 5   | $B_v 0,1,1,0$     | f         | 1.443157181          | fixed                |                      |
| 6   | $B_v 1,3,1,1$     | a         | 1.431253405          | 1.431253405          | 0.000002162574011    |
| 7   | $B_v 1,3,3,1$     | f         | 1.429586892          | fixed                |                      |
| 8   | $D_v 0,1,1,0$     | f         | $2.82774 * 10^{-6}$  | fixed                |                      |
| 9   | $D_v 1,3,1,1$     | a         | $2.94179 * 10^{-6}$  | $2.94179 * 10^{-6}$  | $0.00190 * 10^{-6}$  |
| 10  | $D_v 1,3,3,1$     | f         | $2.929188 * 10^{-6}$ | fixed                |                      |
| 11  | $H_v 0,1,1,0$     | f         | $3.266 * 10^{-12}$   | fixed                |                      |
| 12  | $H_v 1,3,1,1$     | f         | $5.098 * 10^{-12}$   | fixed                |                      |
| 13  | $H_v 1,3,3,1$     | f         | $3.41 * 10^{-12}$    | fixed                |                      |
| 14  | $Q_v 0,1,1,0$     | f         | $7.166195 * 10^{-3}$ | fixed                |                      |
| 15  | $Q_v 1,3,3,1$     | a         | $7.560420 * 10^{-3}$ | $7.560420 * 10^{-3}$ | $0.000575 * 10^{-3}$ |
| 16  | $Q_{vJ} 0,1,1,0$  | f         | $8.1073 * 10^{-8}$   | fixed                |                      |
| 17  | $Q_{vJ} 1,3,3,1$  | f         | $8.63739 * 10^{-8}$  | fixed                |                      |
| 18  | $Q_{vJJ} 0,1,1,0$ | f         | $1.135 * 10^{-12}$   | fixed                |                      |
| 19  | $Q_{vJJ} 1,3,3,1$ | f         | $1.1 * 10^{-12}$     | fixed                |                      |
| 20  | $\rho_v 1,3,3,1$  | f         | $0.22946 * 10^{-8}$  | fixed                |                      |

| Nr. | Symbol            | Fit / fix | Start value           | Fit 1               | Fit 1 $\delta$      |
|-----|-------------------|-----------|-----------------------|---------------------|---------------------|
|     |                   |           |                       |                     | Save 1 in mol       |
| 1   | $Q_{1v 1,4,4,1}$  | f         | $0.0828 * 10^{-4}$    | fixed               |                     |
| 2   | $Q_{1v 0,2,2,0}$  | f         | $0.0705 * 10^{-4}$    | fixed               |                     |
| 3   | $G_{vz 1,4,0,1}$  | a         | 8035.774529           | 8035.774528         | 0.001243462416      |
| 4   | $G_{vz 1,4,2,1}$  | a         | 8056.081778           | 8056.081779         | 0.0008475057078     |
| 5   | $G_{vz 1,4,4,1}$  | f         | 8117.119316           | fixed               |                     |
| 6   | $G_{vz 0,2,0,0}$  | f         | 1399.760658           | fixed               |                     |
| 7   | $G_{vz 0,2,2,0}$  | f         | 1420.418451           | fixed               |                     |
| 8   | $B_v 1,4,0,1$     | a         | 1.435232467           | 1.435232476         | 0.000008929874458   |
| 9   | $B_v 1,4,2,1$     | a         | 1.43439073            | 1.434390702         | 0.00000657285147    |
| 10  | $B_v 1,4,4,1$     | f         | 1.431793125           | fixed               |                     |
| 11  | $B_v 0,2,0,0$     | f         | 1.446801862           | fixed               |                     |
| 12  | $B_v 0,2,2,0$     | f         | 1.445995548           | fixed               |                     |
| 13  | $D_v 1,4,0,1$     | a         | $3.0230 * 10^{-6}$    | $3.0229 * 10^{-6}$  | $0.0109 * 10^{-6}$  |
| 14  | $D_v 1,4,2,1$     | a         | $3.02640 * 10^{-6}$   | $3.02638 * 10^{-6}$ | $0.00808 * 10^{-6}$ |
| 15  | $D_v 1,4,4,1$     | f         | $2.9752995 * 10^{-6}$ | fixed               |                     |
| 16  | $D_v 0,2,0,0$     | f         | $2.88954 * 10^{-6}$   | fixed               |                     |
| 17  | $D_v 0,2,2,0$     | f         | $2.88341 * 10^{-6}$   | fixed               |                     |
| 18  | $H_v 1,4,0,1$     | f         | $6.075 * 10^{-12}$    | fixed               |                     |
| 19  | $H_v 1,4,2,1$     | f         | $5.231 * 10^{-12}$    | fixed               |                     |
| 20  | $H_v 1,4,4,1$     | f         | $2.699 * 10^{-12}$    | fixed               |                     |
| 21  | $H_v 0,2,0,0$     | f         | $4.344 * 10^{-12}$    | fixed               |                     |
| 22  | $H_v 0,2,2,0$     | f         | $3.336 * 10^{-12}$    | fixed               |                     |
| 23  | $Q_{vJ 1,4,4,1}$  | a         | $7.6676955 * 10^{-3}$ | $7.66772 * 10^{-3}$ | $0.00150 * 10^{-3}$ |
| 24  | $Q_{vJ 0,2,2,0}$  | f         | $7.26875 * 10^{-3}$   | fixed               |                     |
| 25  | $Q_{vJJ 1,4,4,1}$ | f         | $10.317 * 10^{-8}$    | fixed               |                     |
| 26  | $Q_{vJJ 0,2,2,0}$ | f         | $8.4951 * 10^{-8}$    | fixed               |                     |
| 27  | $Q_{vJJ 1,4,4,1}$ | f         | $1.1 * 10^{-12}$      | fixed               |                     |
| 28  | $Q_{vJJ 0,2,2,0}$ | f         | $1.159 * 10^{-12}$    | fixed               |                     |
| 29  | $\rho_v 1,4,4,1$  | f         | $-1.676 * 10^{-8}$    | fixed               |                     |
| 30  | $\rho_v 0,2,2,0$  | f         | $-1.714 * 10^{-8}$    | fixed               |                     |

| Nr. | Symbol            | Fit / fix | Start value          | Fit 1               | Fit 1 $\delta$      |
|-----|-------------------|-----------|----------------------|---------------------|---------------------|
|     |                   |           |                      |                     | Save 1 in mol       |
| 1   | $Q_{1v 0,3,3,0}$  | f         | $0.0705 * 10^{-4}$   | fixed               |                     |
| 2   | $Q_{1v 1,5,5,1}$  | f         | $0.0828 * 10^{-4}$   | fixed               |                     |
| 3   | $G_{vz 0,3,3,0}$  | f         | 2139.156364          | fixed               |                     |
| 4   | $G_{vz 1,5,1,1}$  | a         | 8702.133461          | 8702.134221         | 0.002425869451      |
| 5   | $G_{vz 1,5,3,1}$  | a         | 8742.916439          | 8742.910183         | 0.002942843969      |
| 6   | $G_{vz 1,5,5,1}$  | f         | 8824.599012          | fixed               |                     |
| 7   | $G_{vz 0,3,1,0}$  | f         | 2097.719897          | fixed               |                     |
| 8   | $B_v 0,3,3,0$     | f         | 1.448490235          | fixed               |                     |
| 9   | $B_v 1,5,1,1$     | a         | 1.438936176          | 1.43892968          | 0.00002329248319    |
| 10  | $B_v 1,5,3,1$     | a         | 1.437009756          | 1.437060926         | 0.0000280212585     |
| 11  | $B_v 1,5,5,1$     | f         | 1.433593945          | fixed               |                     |
| 12  | $B_v 0,3,1,0$     | f         | 1.450144159          | fixed               |                     |
| 13  | $D_v 0,3,3,0$     | f         | $2.93419 * 10^{-6}$  | fixed               |                     |
| 14  | $D_v 1,5,1,1$     | a         | $3.1487 * 10^{-6}$   | $3.1358 * 10^{-6}$  | $0.0463 * 10^{-6}$  |
| 15  | $D_v 1,5,3,1$     | a         | $2.8790 * 10^{-6}$   | $2.9664 * 10^{-6}$  | $0.0549 * 10^{-6}$  |
| 16  | $D_v 1,5,5,1$     | f         | $3.014074 * 10^{-6}$ | fixed               |                     |
| 17  | $D_v 0,3,1,0$     | f         | $2.94781 * 10^{-6}$  | fixed               |                     |
| 18  | $H_v 0,3,3,0$     | f         | $3.14 * 10^{-12}$    | fixed               |                     |
| 19  | $H_v 1,5,1,1$     | f         | $6.63 * 10^{-12}$    | fixed               |                     |
| 20  | $H_v 1,5,3,1$     | f         | $4.942 * 10^{-12}$   | fixed               |                     |
| 21  | $H_v 1,5,5,1$     | f         | $1.566 * 10^{-12}$   | fixed               |                     |
| 22  | $H_v 0,3,1,0$     | f         | $4.62 * 10^{-12}$    | fixed               |                     |
| 23  | $Q_{vJ 0,3,3,0}$  | f         | $7.375054 * 10^{-3}$ | fixed               |                     |
| 24  | $Q_{vJ 1,5,5,1}$  | a         | $7.79320 * 10^{-3}$  | $7.79098 * 10^{-3}$ | $0.00657 * 10^{-3}$ |
| 25  | $Q_{vJJ 0,3,3,0}$ | f         | $8.9691 * 10^{-8}$   | fixed               |                     |
| 26  | $Q_{vJJ 1,5,5,1}$ | a         | $12.23 * 10^{-8}$    | $11.50 * 10^{-8}$   | $1.85 * 10^{-8}$    |
| 27  | $Q_{vJJ 0,3,3,0}$ | f         | $1.099 * 10^{-12}$   | fixed               |                     |
| 28  | $Q_{vJJ 1,5,5,1}$ | f         | $1.1 * 10^{-12}$     | fixed               |                     |
| 29  | $\rho_v 0,3,3,0$  | f         | $-1.752 * 10^{-8}$   | fixed               |                     |
| 30  | $\rho_v 1,5,5,1$  | a         | $-4.59 * 10^{-8}$    | $-4.23 * 10^{-8}$   | $1.09 * 10^{-8}$    |
